# Supplementary material for: Trisomy of Human Chromosome 21 Orthologs Mapping to Mouse Chromosome 10 Cause Age and Sex-Specific Learning Differences: Relevance to Down Syndrome
Source: MDPI journal article supplement (doi:10.3390/genes12111697), 2021-10-26
Supplement: s1 [file s1]

Table S1: Mouse information

|       |     |     |      | balance beam     | open field | rotarod       | Puzzle Box  |             |             |
|-------|-----|-----|------|------------------|------------|---------------|-------------|-------------|-------------|
| ID    | Sex | Gen | Age  | fastest time (s) | cm         | avg. fall (s) | Trial 2 (s) | Trial 5 (s) | Trial 8 (s) |
| N2999 | F   | C   | 9.00 | 5.00             | 7616.23    | 72.00         | 5.00        | 108.00      | 18.00       |
| S3308 | F   | C   | 9.00 | 14.00            | 3021.52    | 279.67        | 18.00       | 55.00       | 17.00       |
| S3310 | F   | C   | 9.00 | 9.00             | 3652.47    | 153.33        | 5.00        | 31.00       | 9.00        |
| S3319 | F   | C   | 9.00 | fell 3 times     | 3127.05    | 132.67        | 94.00       | 52.00       | 29.00       |
| S4434 | F   | C   | 9.00 | 10.00            | 3839.01    | 171.00        | 21.00       | 82.00       | 41.00       |
| S4435 | F   | C   | 9.00 | no data          | 3530.34    | 159.67        | 11.00       | 78.00       | 46.00       |
| S4520 | F   | C   | 9.00 | fell 3 times     | 4323.66    | 184.33        | 7.00        | 105.00      | 21.00       |
| S4522 | F   | C   | 9.00 | 14.00            | 4781.67    | 160.33        | 7.00        | 152.00      | 49.00       |
| S4523 | F   | C   | 9.00 | 9.00             | 4432.68    | 152.33        | 12.00       | 108.00      | 111.00      |
| S4526 | F   | C   | 9.00 | fell 3 times     | 5632.50    | 193.33        | 9.00        | 169.00      | 42.00       |
| S5053 | F   | C   | 9.00 | no data          | 3848.64    | 167.33        | 5.00        | 70.00       | 20.00       |
| S5054 | F   | C   | 9.00 | no data          | 5487.56    | 207.00        | 4.00        | 91.00       | 30.00       |
| S9664 | F   | C   | 9.00 | no data          | 4076.72    | 199.67        | 9.00        | 96.00       | 20.00       |
|       |     |     |      |                  |            |               |             |             | 34.85       |
| S1994 | F   | C   | 3.00 | 5.00             | 4537.74    | 284.33        | 22.00       | 30.00       | 31.00       |
| S1999 | F   | C   | 3.00 | 6.00             | 4034.13    | 123.67        | 7.00        | 52.00       | 14.00       |
| S2494 | F   | C   | 3.00 | 5.00             | 3737.47    | 229.67        | 19.00       | 104.00      | 15.00       |
| S2512 | F   | C   | 3.00 | 6.00             | 3937.97    | 277.00        | 8.00        | 72.00       | 13.00       |
| S2513 | F   | C   | 3.00 | 5.00             | 4103.63    | 167.00        | 10.00       | 113.00      | 22.00       |
| S3678 | F   | C   | 3.00 | 7.00             | 4281.93    | 236.67        | 8.00        | 52.00       | 14.00       |
| S3679 | F   | C   | 3.00 | 6.00             | 4535.92    | 190.67        | 10.00       | 48.00       | 17.00       |
| S4204 | F   | C   | 3.00 | 7.00             | 4567.51    | 178.67        | 13.00       | 87.00       | 33.00       |
| S4207 | F   | C   | 3.00 | 3.00             | 4709.95    | 125.00        | 9.00        | 92.00       | 33.00       |
| S5127 | F   | C   | 3.00 | no data          | 6052.81    | 283.00        | 13.00       | 217.00      | 24.00       |
| S5163 | F   | C   | 3.00 | no data          | 3754.79    | 191.00        | 10.00       | 48.00       | 24.00       |
| S9073 | F   | C   | 3.00 | 4.00             | 4327.34    | 261.33        | 11.00       | 33.00       | 39.00       |
| S9075 | F   | C   | 3.00 | 3.00             | 5000.18    | 138.33        | 18.00       | 76.00       | 13.00       |
| S9079 | F   | C   | 3.00 | 6.00             | 5260.72    | 76.00         | 14.00       | 59.00       | 22.00       |
| S9081 | F   | C   | 3.00 | 5.00             | no data    | 175.33        | 16.00       | 99.00       | 27.00       |
|       |     |     |      |                  |            |               |             |             |             |
| S0904 | F   | Ts  | 9.00 | 10.00            | 6090.75    | 247.00        | 8.00        | 50.00       | 16.00       |
| S0905 | F   | Ts  | 9.00 | 7.00             | 5654.58    | 261.00        | 7.00        | 168.00      | 14.00       |
| S0906 | F   | Ts  | 9.00 | 5.00             | 6293.72    | 262.50        | 11.00       | 20.00       | 27.00       |
| S0907 | F   | Ts  | 9.00 | 6.00             | 5164.79    | 240.00        | 17.00       | 153.00      | 25.00       |
| S1687 | F   | Ts  | 9.00 | fell 3 times     | 4396.04    | 140.67        | 10.00       | 155.00      | 14.00       |
| S3307 | F   | Ts  | 9.00 | 14.00            | 4382.26    | 274.67        | 18.00       | 33.00       | 25.00       |
| S3309 | F   | Ts  | 9.00 | 13.00            | 3895.14    | 280.33        | 17.00       | 59.00       | 65.00       |
| S3311 | F   | Ts  | 9.00 | 17.00            | 5351.64    | 109.67        | 5.00        | 31.00       | 30.00       |
| S3313 | F   | Ts  | 9.00 | fell 3 times     | 4196.58    | 190.33        | 17.00       | 82.00       | 19.00       |
| S3314 | F   | Ts  | 9.00 | 12.00            | 4147.78    | 122.67        | 16.00       | 78.00       | 36.00       |
| S3315 | F   | Ts  | 9.00 | no data          | 4385.10    | 124.33        | 10.00       | 160.00      | 38.00       |
| S5052 | F   | Ts  | 9.00 | no data          | 4708.87    | 197.00        | 3.00        | 68.00       | 29.00       |
| S5055 | F   | Ts  | 9.00 | no data          | 4846.08    | 237.67        | 7.00        | 54.00       | 15.00       |
| S1995 | F   | Ts  | 3.00 | 10.00            | 4213.73    | 300.00        | 11.00       | 75.00       | 22.00       |

|        |   |    |      |              |         |        |       |        |        |
|--------|---|----|------|--------------|---------|--------|-------|--------|--------|
| S1997  | F | Ts | 3.00 | 4.00         | 4227.43 | 102.33 | 16.00 | 150.00 | 22.00  |
| S2100  | F | Ts | 3.00 | 17.00        | 3970.37 | 94.97  | 35.00 | 110.00 | 11.00  |
| S2493  | F | Ts | 3.00 | 4.00         | 5829.73 | 129.33 | 7.00  | 255.00 | 11.00  |
| S2495  | F | Ts | 3.00 | 4.00         | 4329.30 | 201.33 | 13.00 | 54.00  | 15.00  |
| S2511  | F | Ts | 3.00 | 6.00         | 4465.34 | 187.00 | 7.00  | 76.00  | 20.00  |
| S3677  | F | Ts | 3.00 | 5.00         | 5592.57 | 228.00 | 8.00  | 136.00 | 19.00  |
| S3680  | F | Ts | 3.00 | 14.00        | 5001.49 | 239.33 | 6.00  | 104.00 | 21.00  |
| S4203  | F | Ts | 3.00 | 3.00         | 3266.28 | 268.00 | 35.00 | 115.00 | 35.00  |
| S4205  | F | Ts | 3.00 | 4.00         | 4900.55 | 249.00 | 13.00 | 43.00  | 22.00  |
| S4206  | F | Ts | 3.00 | 6.00         | 5710.86 | 166.67 | 17.00 | 62.00  | 47.00  |
| S5128  | F | Ts | 3.00 | no data      | 5174.23 | 188.67 | 13.00 | 117.00 | 25.00  |
| S5164  | F | Ts | 3.00 | no data      | 4459.04 | 254.67 | 10.00 | 87.00  | 19.00  |
| S9074  | F | Ts | 3.00 | 5.00         | 4626.03 | 150.33 | 5.00  | 84.00  | 31.00  |
| S9080  | F | Ts | 3.00 | 4.00         | 4759.14 | 50.00  | 9.00  | 105.00 | 94.00  |
| N2975  | M | C  | 9.00 | no data      | 5942.74 | 76.00  | 17.00 | 74.00  | 72.00  |
| N2976  | M | C  | 9.00 | 6.00         | 5132.72 | 111.33 | 22.00 | 134.00 | 33.00  |
| N2978  | M | C  | 9.00 | 16.00        | 6987.10 | 127.67 | 12.00 | 170.00 | 110.00 |
| S0901  | M | C  | 9.00 | 9.00         | 5289.08 | 129.33 | 16.00 | 62.00  | 25.00  |
| S3304  | M | C  | 9.00 | no data      | 3638.90 | 220.33 | 46.00 | 84.00  | 38.00  |
| S3305  | M | C  | 9.00 | 10.00        | 4079.15 | 212.33 | 22.00 | 112.00 | 8.00   |
| S3306  | M | C  | 9.00 | 10.00        | 5141.78 | 196.33 | 14.00 | 108.00 | 67.00  |
| S3312  | M | C  | 9.00 | fell 3 times | 4476.75 | 61.00  | 18.00 | 43.00  | 32.00  |
| S3317  | M | C  | 9.00 | fell 3 times | 4610.51 | 89.67  | 18.00 | 70.00  | 84.00  |
| S4432  | M | C  | 9.00 | 7.00         | 5536.42 | 114.67 | 13.00 | 254.00 | 115.00 |
| S4521  | M | C  | 9.00 | 6.00         | 4605.07 | 228.67 | 26.00 | 60.00  | 32.00  |
| S9651  | M | C  | 9.00 | no data      | 6119.00 | 73.67  | 6.00  | 148.00 | 28.00  |
| S9660  | M | C  | 9.00 | no data      | 5303.34 | 105.67 | 11.00 | 57.00  | 17.00  |
| S9661  | M | C  | 9.00 | no data      | 5867.17 | 123.00 | 8.00  | 93.00  | 28.00  |
| 437.00 | M | C  | 3.00 | 9.00         | 4618.54 | 193.67 | 5.00  | 53.00  | 85.00  |
| 439.00 | M | C  | 3.00 | 7.00         | 5359.40 | 172.00 | 10.00 | 65.00  | 41.00  |
| S2492  | M | C  | 3.00 | 4.00         | 4721.10 | 227.33 | 28.00 | 59.00  | 31.00  |
| S3673  | M | C  | 3.00 | 15.00        | 3161.57 | 241.67 | 23.00 | 131.00 | 26.00  |
| S3674  | M | C  | 3.00 | 4.00         | 4075.48 | 190.33 | 11.00 | 52.00  | 25.00  |
| S3675  | M | C  | 3.00 | 5.00         | 4022.13 | 161.67 | 13.00 | 86.00  | 23.00  |
| S5124  | M | C  | 3.00 | no data      | 4994.96 | 167.33 | 13.00 | 132.00 | 37.00  |
| S5125  | M | C  | 3.00 | no data      | 5558.30 | 147.67 | 9.00  | 243.00 | 146.00 |
| S5126  | M | C  | 3.00 | no data      | 5389.88 | 216.00 | 24.00 | 94.00  | 63.00  |
| S5160  | M | C  | 3.00 | no data      | 5307.12 | 266.33 | 4.00  | 60.00  | 22.00  |
| S9065  | M | C  | 3.00 | 5.00         | 4397.80 | 288.00 | 14.00 | 38.00  | 38.00  |
| S9066  | M | C  | 3.00 | 6.00         | 4058.09 | 186.67 | 7.00  | 96.00  | 33.00  |
| S9067  | M | C  | 3.00 | 6.00         | no data | 259.00 | 13.00 | 75.00  | 55.00  |
| N2979  | M | Ts | 9.00 | 6.00         | 6364.74 | 263.67 | 13.00 | 117.00 | 25.00  |
| N2998  | M | Ts | 9.00 | no data      | 3996.19 | 104.00 | 13.00 | 71.00  | 32.00  |
| S0902  | M | Ts | 9.00 | 6.00         | 5909.31 | 182.67 | 4.00  | 95.00  | 19.00  |
| S1686  | M | Ts | 9.00 | 10.00        | 5853.30 | 183.67 | 15.00 | 36.00  | 10.00  |
| S3316  | M | Ts | 9.00 | fell 3 times | 4447.63 | 252.00 | 12.00 | 50.00  | 50.00  |

|        |   |    |      |              |         |        |       |        |        |
|--------|---|----|------|--------------|---------|--------|-------|--------|--------|
| S4433  | M | Ts | 9.00 | 13.00        | 4028.37 | 143.33 | 13.00 | 52.00  | 30.00  |
| S4517  | M | Ts | 9.00 | fell 3 times | 4222.50 | 150.00 | 10.00 | 124.00 | 79.00  |
| S4518  | M | Ts | 9.00 | 5.00         | 5078.19 | 226.00 | 22.00 | 184.00 | 38.00  |
| S9554  | M | Ts | 9.00 | no data      | 4835.79 | 127.00 | 10.00 | 103.00 | 46.00  |
| S9555  | M | Ts | 9.00 | no data      | 4878.84 | 262.00 | 7.00  | 300.00 | 32.00  |
| S9556  | M | Ts | 9.00 | no data      | 4169.22 | 154.00 | 6.00  | 89.00  | 28.00  |
| S9557  | M | Ts | 9.00 | no data      | 4108.82 | 285.33 | 8.00  | 44.00  | 17.00  |
| S9652  | M | Ts | 9.00 | no data      | 5198.55 | 84.33  | 10.00 | 127.00 | 22.00  |
| S9659  | M | Ts | 9.00 | no data      | 3869.15 | 214.00 | 16.00 | 112.00 | 32.00  |
| 438.00 | M | Ts | 3.00 | 6.00         | 5165.06 | 174.00 | 13.00 | 49.00  | 39.00  |
| S1990  | M | Ts | 3.00 | 7.00         | 2937.45 | 172.00 | 14.00 | 86.00  | 38.00  |
| S1991  | M | Ts | 3.00 | 4.00         | 3498.85 | 140.33 | 7.00  | 53.00  | 26.00  |
| S1992  | M | Ts | 3.00 | 6.00         | 3270.94 | 226.67 | 15.00 | 64.00  | 34.00  |
| S1993  | M | Ts | 3.00 | 6.00         | 4123.63 | 156.33 | 7.00  | 69.00  | 30.00  |
| S1998  | M | Ts | 3.00 | 5.00         | 3790.07 | 281.33 | 10.00 | 58.00  | 29.00  |
| S2510  | M | Ts | 3.00 | 6.00         | 3802.10 | 219.67 | 10.00 | 30.00  | 36.00  |
| S3676  | M | Ts | 3.00 | 6.00         | 4233.29 | 235.33 | 17.00 | 65.00  | 28.00  |
| S4202  | M | Ts | 3.00 | 7.00         | 3636.41 | 204.00 | 8.00  | 73.00  | 27.00  |
| S5123  | M | Ts | 3.00 | no data      | 4145.92 | 226.00 | 20.00 | 84.00  | 30.00  |
| S5159  | M | Ts | 3.00 | no data      | 5771.62 | 115.67 | 8.00  | 46.00  | 28.00  |
| S5161  | M | Ts | 3.00 | no data      | 4848.18 | 230.33 | 16.00 | 57.00  | 28.00  |
| S5162  | M | Ts | 3.00 | no data      | 5138.35 | 235.00 | 18.00 | 49.00  | 50.00  |
| S9064  | M | Ts | 3.00 | 8.00         | 4187.14 | 300.00 | 15.00 | 84.00  | 123.00 |

Table S2: Task comparisons

|                |   |
|----------------|---|
| Double-H       |   |
| Avg. Day 4 (s) |   |
| 5.75           | 0 |
| 13.25          | 0 |
| 27.25          |   |
| 42.75          |   |
| 8.00           |   |
| 9.75           |   |
| 14.25          |   |
| 32.00          |   |
| 28.75          |   |
| 32.25          |   |
| 5.75           |   |
| 24.00          |   |
| 57.00          |   |
|                |   |
| 9.75           |   |
| 17.00          |   |
| 51.75          |   |
| 28.00          |   |
| 42.75          |   |
| 27.25          |   |
| 25.75          |   |
| 29.75          |   |
| 20.75          |   |
| 17.25          |   |
| 17.25          |   |
| 12.25          |   |
| 15.25          |   |
| 28.75          |   |
| 13.25          |   |
|                |   |
| 19.75          |   |
| 22.50          |   |
| 24.00          |   |
| 17.75          |   |
| 7.75           |   |
| 14.75          |   |
| 31.00          |   |
| 10.50          |   |
| 6.00           |   |
| 21.50          |   |
| 27.75          |   |
| 30.75          |   |
| 9.25           |   |
| 15.50          |   |

|       |  |
|-------|--|
| 31.50 |  |
| 20.00 |  |
| 5.00  |  |
| 17.00 |  |
| 43.50 |  |
| 49.50 |  |
| 3.25  |  |
| 11.00 |  |
| 10.50 |  |
| 29.75 |  |
| 32.25 |  |
| 9.25  |  |
| 2.25  |  |
| 19.75 |  |
| 15.50 |  |
| 4.25  |  |
| 20.75 |  |
| 11.50 |  |
| 21.25 |  |
| 10.00 |  |
| 25.25 |  |
| 28.75 |  |
| 11.75 |  |
| 27.00 |  |
| 16.25 |  |
| 8.25  |  |
| 7.25  |  |
| 9.00  |  |
| 33.50 |  |
| 17.00 |  |
| 10.50 |  |
| 6.25  |  |
| 41.50 |  |
| 15.25 |  |
| 7.00  |  |
| 24.50 |  |
| 20.25 |  |
| 20.00 |  |
| 10.00 |  |
| 12.00 |  |
| 9.75  |  |
| 7.50  |  |
| 10.00 |  |
| 9.75  |  |
| 9.00  |  |
| 22.25 |  |

|       |  |
|-------|--|
| 6.50  |  |
| 16.00 |  |
| 19.00 |  |
| 2.50  |  |
| 11.50 |  |
| 17.25 |  |
| 15.00 |  |
| 26.25 |  |
| 9.00  |  |
| 11.00 |  |
| 10.00 |  |
| 7.75  |  |
| 13.50 |  |
| 6.25  |  |
| 7.25  |  |
| 17.00 |  |
| 2.75  |  |
| 6.00  |  |
| 16.75 |  |
| 18.25 |  |
| 8.50  |  |
| 17.75 |  |
| 2.00  |  |
